# Supplementary material for: Combined Impact of Inflammation and Pharmacogenomic Variants on Voriconazole Trough Concentrations: A Meta-Analysis of Individual Data
Source: MDPI journal article supplement (doi:10.3390/jcm10102089), 2021-05-13
Supplement: s1 [file s1]

**Supplementary data**

**Table S1.** Patient characteristics according to the studies included in the meta-analysis.

|                           | Gautier-Veyret et al,<br>2015 [19] | Gautier-Veyret et al,<br>2019 [25] | Gautier-Veyret et al,<br>2020 [26] | Yamada et al,<br>2015 [30] | Lamoureux et al,<br>2015 [15] | Veringa et al,<br>2017 [28] | Total             |
|---------------------------|------------------------------------|------------------------------------|------------------------------------|----------------------------|-------------------------------|-----------------------------|-------------------|
| Number of patients        | 28                                 | 57*                                | 42                                 | 47                         | 9                             | 20                          | 203               |
| Number of VRC Cmin        | 255                                | 62                                 | 150                                | 47                         | 21                            | 219                         | 754               |
| Weight (kg)               | 67.0 (37.0-97.0)                   | 68.0 (41.0-105)                    | 71.0 (45.4-138)                    | 52.0 (34.0-76.0)           | 56.0 (50.0-80.0)              | 71.3 (50.0-109)             | 68.0 (34.0-138.0) |
| Missing data              | 55 (21.6)                          | 5 (8.1)                            | 7 (4.7)                            | 0 (0)                      | 0 (0)                         | 0 (0)                       | 67 (8.9)          |
| Main pathology:           |                                    |                                    |                                    |                            |                               |                             |                   |
| Hematological             |                                    |                                    |                                    |                            |                               |                             |                   |
| malignancies              | 28 (100)                           | 57 (100)                           | 42 (100)                           | 27 (57.4)                  | -                             | 15 (75)                     | 169 (83.3)        |
| Organ transplant          | 0 (0)                              | 0 (0)                              | 0 (0)                              | 0 (0)                      | -                             | 3 (15)                      | 3 (1.5)           |
| Other                     | 0 (0)                              | 0 (0)                              | 0 (0)                              | 20 (42.6)                  | -                             | 2 (10)                      | 22 (10.8)         |
| Missing data              | 0 (0)                              | 0 (0)                              | 0 (0)                              | 0 (0)                      | 9 (100)                       | 0 (0)                       | 9 (4.4)           |
| Daily dose (mg)           | 400 (52.7-800)                     | 400 (200-800)                      | 400 (200-700)                      | 400 (200-600)              | 400 (200-500)                 | 400 (200-1050)              | 400 (52.7-1050)   |
| Route of administration   |                                    |                                    |                                    |                            |                               |                             |                   |
| IV                        | 32 (12.5)                          | 24 (38.7)                          | 62 (41.3)                          | 13 (27.7)                  | 0 (0)                         | 36 (16.4)                   | 167 (22.1)        |
| Oral                      | 223 (87.4)                         | 38 (61.3)                          | 88 (58.7)                          | 34 (72.3)                  | 21 (100)                      | 183 (83.6)                  | 587 (77.9)        |
| Liver function            |                                    |                                    |                                    |                            |                               |                             |                   |
| ASAT (UI/L)               | 33 (5-518)                         | 22 (3-210)                         | 26 (6-298)                         | 27 (9-102)                 | 27 (18-133)                   | 30 (10-10360)               | 29.0 (3-10360)    |
| Missing data              | 13 (5.1)                           | 5 (8.1)                            | 8 (5.3)                            | 0 (0)                      | 0 (0)                         | 36 (16.4)                   | 62 (8.2)          |
| ALAT (UI/L)               | 46 (11-761)                        | 29 (7-425)                         | 27 (4-498)                         | 19 (5-149)                 | 26 (10-284)                   | 38 (11-2605)                | 35.0 (4-8062)     |
| Missing data              | 14 (5.5)                           | 5 (8.1)                            | 8 (5.3)                            | 0 (0)                      | 0 (0)                         | 36 (16.4)                   | 63 (8.4)          |
| Concomitant PPI treatment | 247 (96.8)                         | 45 (72.6)                          | 125 (83.3)                         | 9 (19.1)                   | 12 (57.1)                     | 126 (57.5)                  | 564 (74.8)        |
| CYP2C19 phenotype         |                                    |                                    |                                    |                            |                               |                             |                   |
| EM                        | 11 (39.3)                          | 28 (49.1)                          | 18 (42.8)                          | 16 (34.0)                  | 5 (55.6)                      | 9 (45.0)                    | 87 (42.9)         |
| IM                        | 7 (25.0)                           | 13 (22.8)                          | 12 (28.6)                          | 25 (53.2)                  | 1 (11.1)                      | 6 (30.0)                    | 64 (31.5)         |
| PM                        | 0 (0)                              | 2 (3.5)                            | 0 (0)                              | 6 (12.8)                   | 1 (11.1)                      | 0 (0)                       | 9 (4.4)           |
| RM                        | 8 (28.6)                           | 14 (24.6)                          | 12 (28.6)                          | 0 (0)                      | 2 (22.2)                      | 4 (20.0)                    | 40 (19.7)         |
| UM                        | 2 (7.1)                            | 0 (0)                              | 0 (0)                              | 0 (0)                      | 0 (0)                         | 1 (5.0)                     | 3 (1.5)           |
| Missing data              | 0 (0)                              | 0 (0)                              | 0 (0)                              | 0 (0)                      | 0 (0)                         | 0 (0)                       | 0 (0)             |
| CYP3A4 phenotype          |                                    |                                    |                                    | ND                         |                               | ND                          |                   |
| EM                        | 21 (75)                            | 47 (82.5)                          | 39 (92.9)                          | -                          | 7 (77.8)                      | -                           | 114 (56.2)        |
| IM                        | 7 (25)                             | 10 (17.5)                          | 3 (7.1)                            | -                          | 2 (22.2)                      | -                           | 22 (10.8)         |
| Missing data              | 0 (0)                              | 0 (0)                              | 0 (0)                              | 47 (100)                   | 0 (0)                         | 20 (100)                    | 67 (33.0)         |
| CYP3A5 phenotype          |                                    |                                    |                                    | ND                         |                               | ND                          |                   |
| No expressor              | 26 (92.9)                          | 49 (86.0)                          | 33 (78.6)                          | -                          | 8 (88.9)                      | -                           | 116 (57.1)        |
| Expressor                 | 2 (7.1)                            | 8 (14.0)                           | 9 (21.4)                           | -                          | 1 (11.1)                      | -                           | 20 (9.9)          |
| Missing data              | 0 (0)                              | 0 (0)                              | 0 (0)                              | 47 (100)                   | 0 (0)                         | 20 (100)                    | 67 (33.0)         |

ALAT = alanine aminotransferase; ASAT = Aspartate aminotransferase; Cmin = trough concentration; CYP = cytochrome P450; EM = extensive metabolizer; IM = intermediate metabolizer; IV = intravenous; PM = poor metabolizer; PPI = pump proton inhibitor; RM = rapid metabolizer; UM = ultra-rapid metabolizer; VRC = voriconazole.

\*Five patients were included in studies [19] and [25] with voriconazole trough concentrations determined at different times.

**Table S2:** Calculated combined genetic scores (number of patients) according to CYP2C19 and CYP3A4/5 genotypes.

|                            |                                                     |     | CYP2C19              |                          |                       |                          |                      |
|----------------------------|-----------------------------------------------------|-----|----------------------|--------------------------|-----------------------|--------------------------|----------------------|
|                            |                                                     |     | *2/*2 or *2/*3       | *2/*1 or *3/*1           | *1/*1 or *2/*17       | *17/*1                   | *17/*17              |
| Specific CYP genetic score |                                                     |     | 0                    | 0.5                      | 1                     | 1.5                      | 2                    |
| CYP3A4/5                   | 3A4 *22/*1 and 3A5 *3/*3                            | 0.5 | 0.5 (n=1)            | 1 (n=5)                  | 1.5 (n=6)             | 2 (n=8)                  | 2.5 (n=0)            |
|                            | 3A4 *1/*1 and 3A5 *3/*3 or 3A4 *22/*1 and 3A5 *3/*1 | 1   | 1 (n=2) <sup>¶</sup> | 1.5 (n=16) <sup>¶¶</sup> | 2 (n=55) <sup>#</sup> | 2.5 (n=24) <sup>##</sup> | 3 (n=1) <sup>§</sup> |
|                            | 3A4 *1/*1 and 3A5 *1/*3                             | 1.5 | 1.5 (n=0)            | 2 (n=5)                  | 2.5 (n=4)             | 3 (n=2)                  | 3.5 (n=1)            |
|                            | 3A4 *1/*1 and 3A5 *1/*1                             | 2   | 2 (n=0)              | 2.5 (n=1)                | 3 (n=3)               | 3.5 (n=2)                | 4 (n=0)              |

CYP = cytochrome P450. Light, medium, and dark grey indicate genetic scores < 2, = 2, and > 2, respectively.

<sup>¶</sup> CYP3A4: \*1/\*1 (n = 2) and CYP3A5: \*3/\*3 (n = 2).

<sup>¶¶</sup> CYP3A4: \*1/\*1 (n = 15), \*22/\*1 (n = 1) and CYP3A5: \*3/\*3 (n = 15); \*3/\*1 (n = 1).

<sup>#</sup> CYP2C19: \*1/\*1 (n = 50), \*2/\*17 (n = 5), CYP3A4: \*1/\*1 (n = 54), \*22/\*1 (n = 1) and CYP3A5: \*3/\*3 (n = 54), \*1/\*3 (n = 1).

<sup>##</sup> CYP3A4: \*1/\*1 (n = 24) and CYP3A5: \*3/\*3 (n = 24).

<sup>§</sup> CYP3A4: \*1/\*1 (n = 1) and CYP3A5: \*3/\*3 (n = 1).

**Table S3.** Quality assessment of included cohort studies.

| Study                           | Selection                                |                                     |                           |                                                   | Comparability                                                   |                       | Outcome                                         |                                  | Total score |
|---------------------------------|------------------------------------------|-------------------------------------|---------------------------|---------------------------------------------------|-----------------------------------------------------------------|-----------------------|-------------------------------------------------|----------------------------------|-------------|
|                                 | Representativeness of the exposed cohort | Selection of the non-exposed cohort | Ascertainment of exposure | Outcome of interest not present at start of study | Comparability of cohorts on the basis of the design or analysis | Assessment of outcome | Was follow up long enough for outcomes to occur | Adequacy of follow up of cohorts |             |
| Gautier-Veyret et al, 2015 [19] | *                                        | *                                   | *                         | *                                                 | **                                                              | *                     | NA                                              | NA                               | *****       |
| Gautier-Veyret et al, 2020 [26] | *                                        | *                                   | *                         | *                                                 | **                                                              | *                     | NA                                              | NA                               | *****       |
| Yamada et al, 2015 [29]         | *                                        | *                                   | *                         | *                                                 | **                                                              | *                     | NA                                              | NA                               | *****       |
| Lamoureux et al, 2015 [15]      | *                                        | *                                   | *                         | *                                                 | **                                                              | *                     | NA                                              | NA                               | *****       |
| Veringa et al, 2017 [28]        | *                                        | *                                   | *                         | *                                                 | **                                                              | *                     | NA                                              | NA                               | *****       |
| NA = not applicable.            |                                          |                                     |                           |                                                   |                                                                 |                       |                                                 |                                  |             |

**Table S3bis.** Quality assessment of included case control study.

| Study                                  | Selection                   |                                 |                       |                        | Comparability                                                 |                           | Exposure                                            |                   | Total score |
|----------------------------------------|-----------------------------|---------------------------------|-----------------------|------------------------|---------------------------------------------------------------|---------------------------|-----------------------------------------------------|-------------------|-------------|
|                                        | Adequate definition of case | Representativeness of the cases | Selection of controls | Definition of controls | Comparability of cases on the basis of the design or analysis | Ascertainment of exposure | Same method of ascertainment for cases and controls | Non-response rate |             |
| <b>Gautier-Veyret et al, 2019 [27]</b> | *                           | *                               | *                     | *                      | **                                                            | *                         | *                                                   | NA                | *****       |

NA = not applicable.
